# Supplementary material
Source: publisher site journal article supplement (https://www.oncotarget.com/article/28291)
Supplement: Supplementary file 1 [file 28291]

## Addendum

**Addendum: Exploration of the recurrence in radiation brain necrosis after bevacizumab discontinuation****Hongqing Zhuang<sup>1</sup>, Xiangkun Yuan<sup>2</sup>, Joe Y. Chang<sup>3</sup>, Yongchun Song<sup>1</sup>, Junjie Wang<sup>4</sup>, Zhiyong Yuan<sup>1</sup>, Xiaoguang Wang<sup>1</sup> and Ping Wang<sup>1</sup>**

<sup>1</sup>Department of Radiotherapy, Tianjin Medical University Cancer Institute and Hospital, National Clinical Research Center for Cancer, Tianjin Key Laboratory of Cancer Prevention and Therapy, Tianjin, China

<sup>2</sup>Department of Radiotherapy, Hebei Province Cangzhou Hospital of Integrated Traditional and Western Medicine (Cangzhou No. 2 Hospital), Hebei, China

<sup>3</sup>Department of Radiation Oncology, Division of Radiation Oncology, The University of Texas MD Anderson Cancer Center, Houston, Texas, United States of America

<sup>4</sup>Department of Radiotherapy, Peking University 3rd Hospital, Beijing, China

**Published:**

**Copyright:** © 2022 Zhuang et al. This is an open access article distributed under the terms of the [Creative Commons Attribution License](#) (CC BY 3.0), which permits unrestricted use, distribution, and reproduction in any medium, provided the original author and source are credited.

**Consent was added to this article:** Patient consent was required and obtained.

Original article: Oncotarget. 2016; 7:48842–48849. <https://doi.org/10.18632/oncotarget.7768>
